# Supplementary material for: Unveiling structural and functional divergences of bacterial tRNA dihydrouridine synthases: perspectives on the evolution scenario
Source: PubMed Central journal article supplement — Nucleic Acids Res. 2017 Dec 27;46(3):1386–94. doi: 10.1093/nar/gkx1294 (PMC5814906; doi:10.1093/nar/gkx1294), 2017-12-27
Supplement: gkx1294_supp.pdf [file gkx1294_supp.pdf]

## Supplementary Information

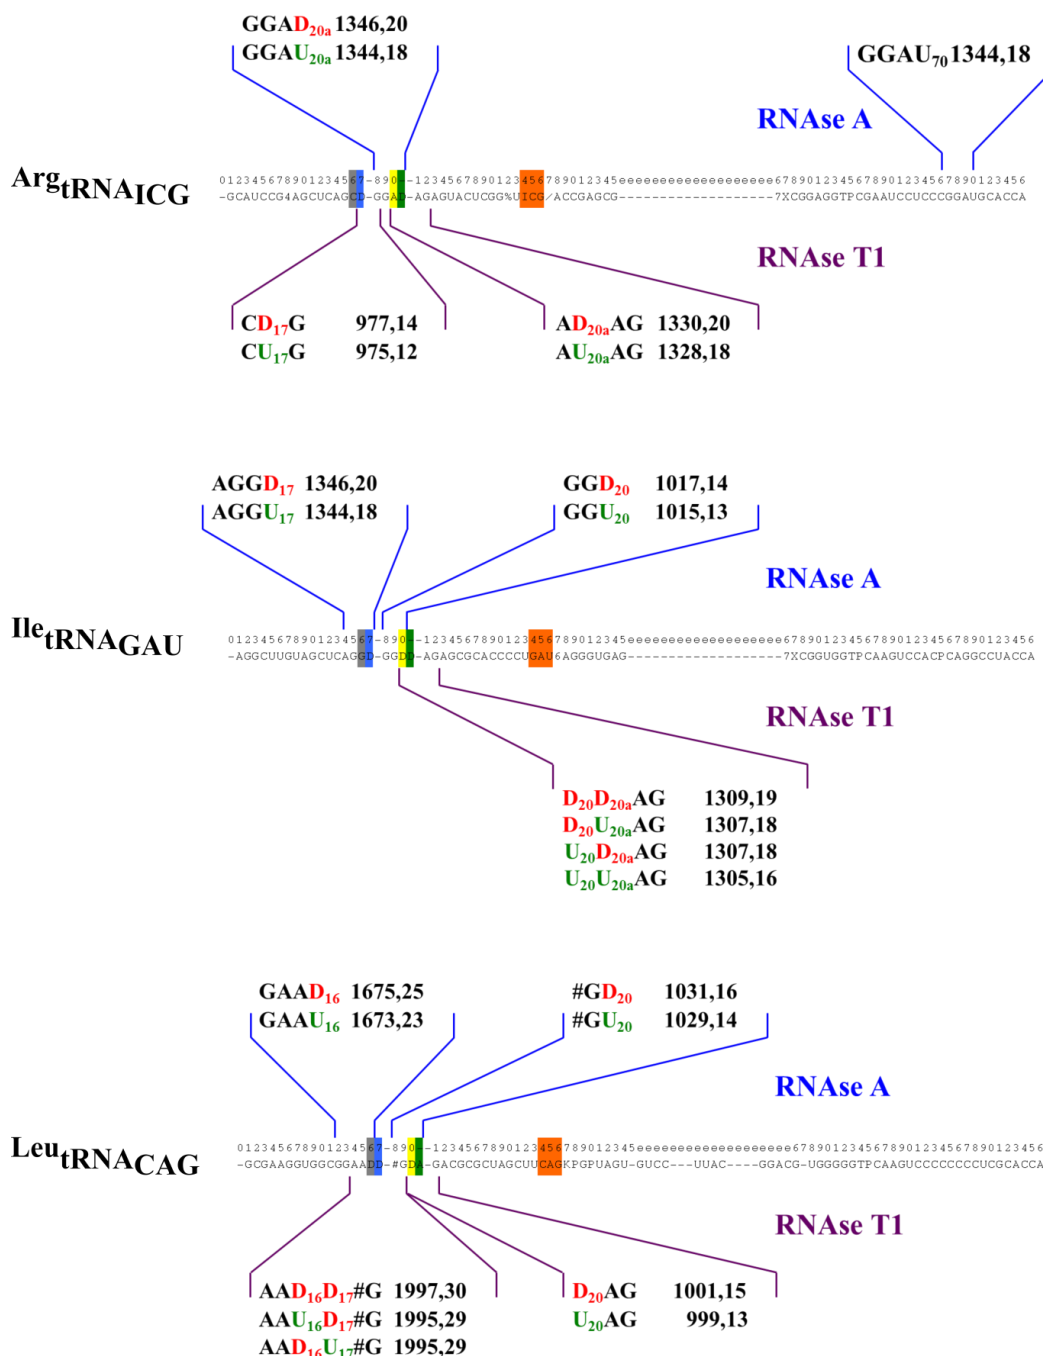

**Supplementary Figure 1. Sequence of the three tRNA used to determine *E. coli* Dus specificities.**

*E. coli* Arg tRNA<sub>ICG</sub>, Ile tRNA<sub>GAU</sub> or Leu tRNA<sub>CAG</sub> sequences with emphasis on the D-containing fragments issued from a theoretical digest by RNase A or T1. In orange is highlighted the anticodon. In blue arrows are the fragments of interest upon digestion with RNase A while in purple are those generated by RNase T1. The expected *m/z* for protonated fragments are indicated next to each D-containing fragment of interest. The symbol # represents the 2'-O-methylguanosine. For the nomenclature of other modified nucleosides present in the three tRNA sequences, refer to <http://modomics.genesilico.pl/modifications>.

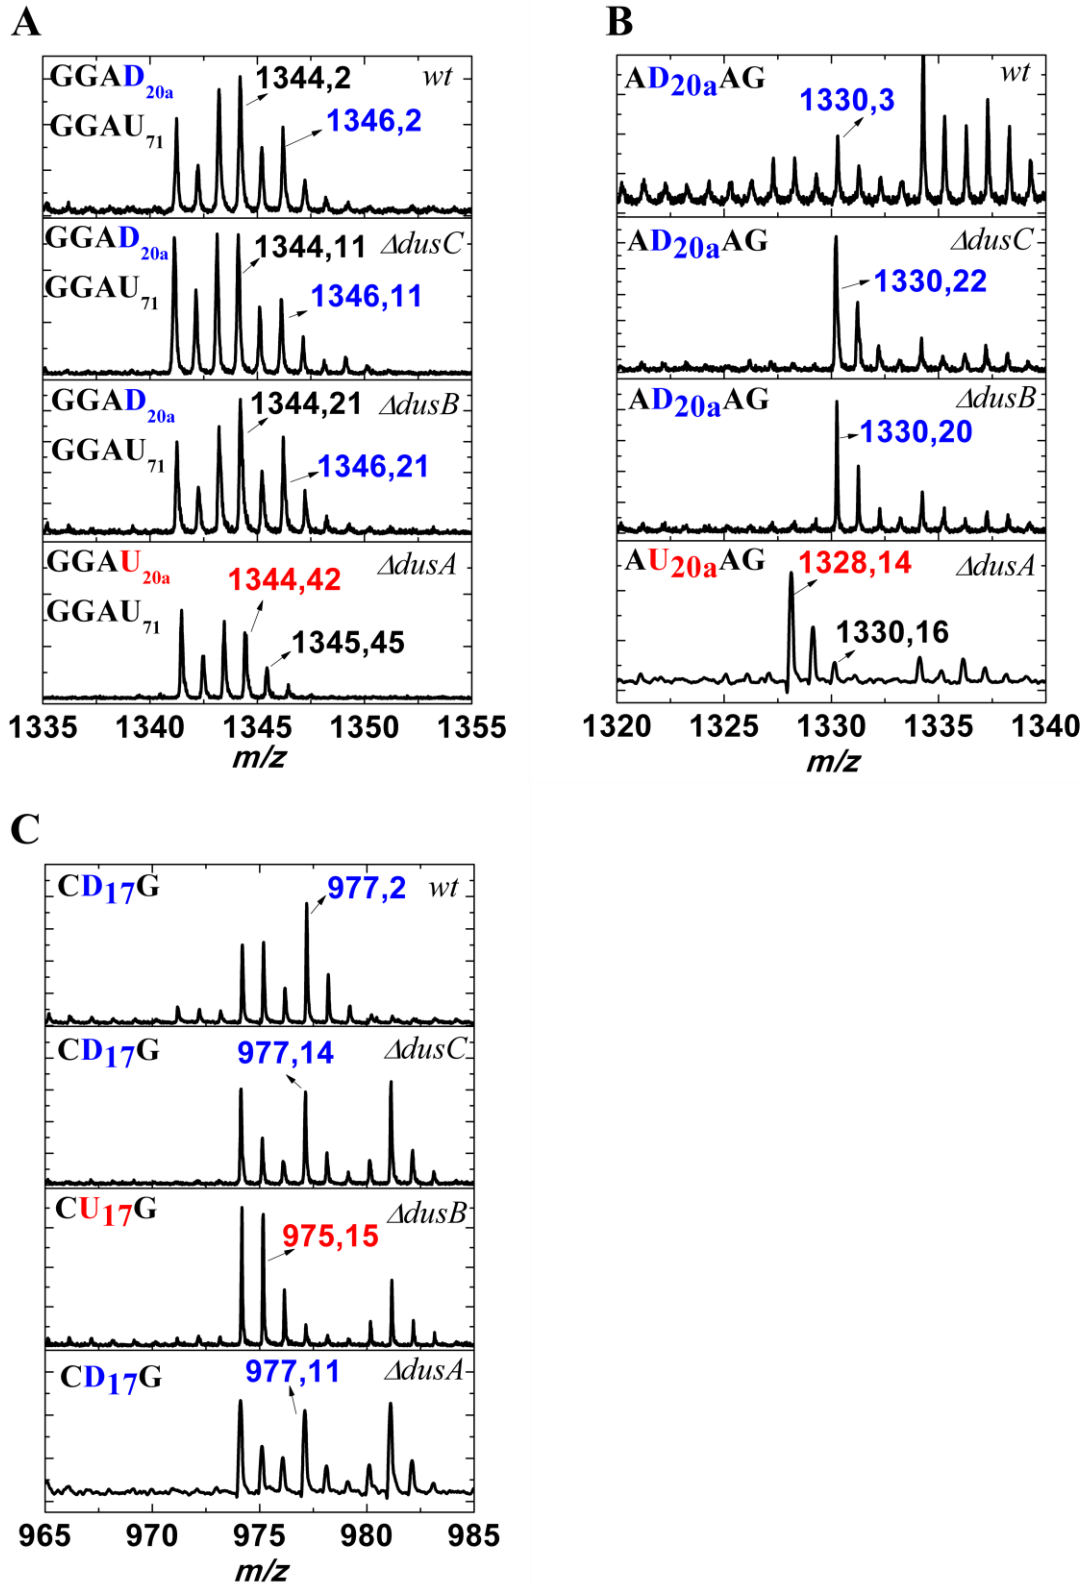

**Supplementary Figure 2.** MALDI-TOF analysis of <sup>Arg</sup>tRNA<sub>ICG</sub> extracted from wild-type and the different single *E. coli dus* knockout strains. (A) Represent a zoom in the spectral region of GGAU<sub>20a</sub> after digestion with RNase A. (B) and (C) are zooms in spectral regions of AU<sub>20a</sub>AG and CU<sub>17</sub>G, respectively, obtained after RNase T1 digestion. The strains are shown in italic while the sequence and *m/z* of the fragments are in red and blue for absence of dihydrouridine or presence, respectively.

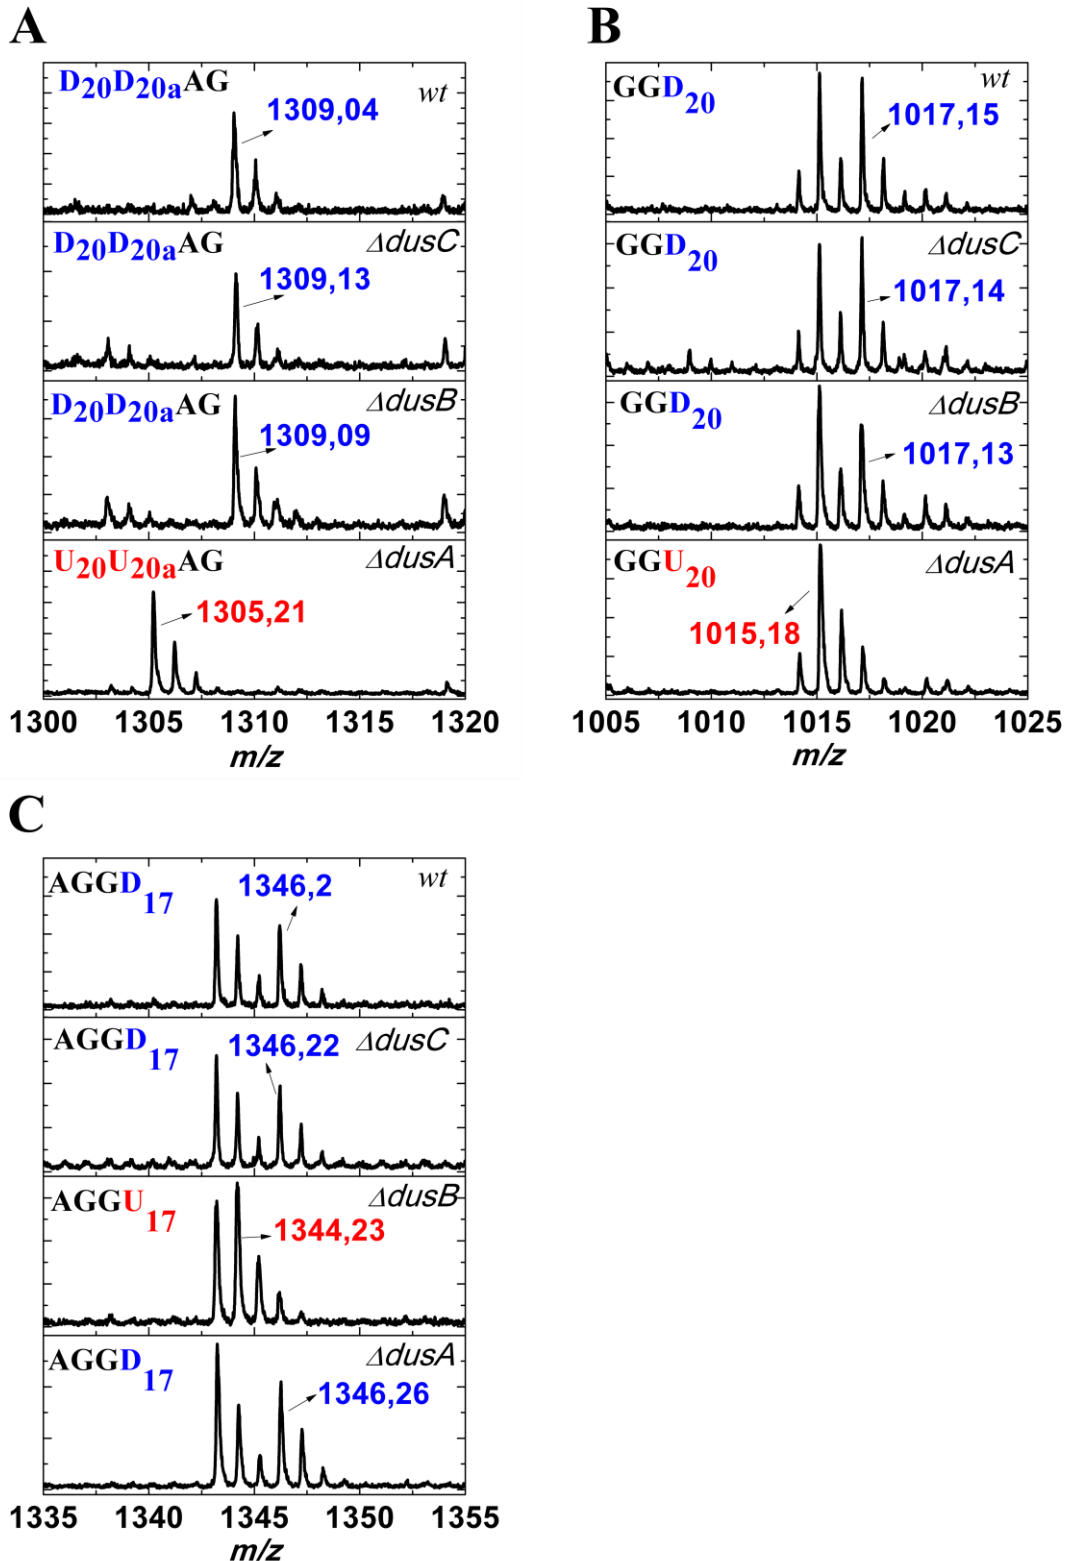

**Supplementary Figure 3.** MALDI-TOF analysis of <sup>15</sup>N-tRNA<sub>GAU</sub> extracted from wild-type and the different single *E. coli* *dus* knockout strains. (A) Represent a zoom in the spectral region of U<sub>20</sub>U<sub>20a</sub>AG after digestion with RNase T1. (B) and (C) are zooms in spectral regions of GGU<sub>20</sub> and AGGU<sub>17</sub>, respectively, obtained after RNase A digestion. The strains are shown in italic while the sequence and *m/z* of the fragments are in red and blue for absence of dihydrouridine or presence respectively.

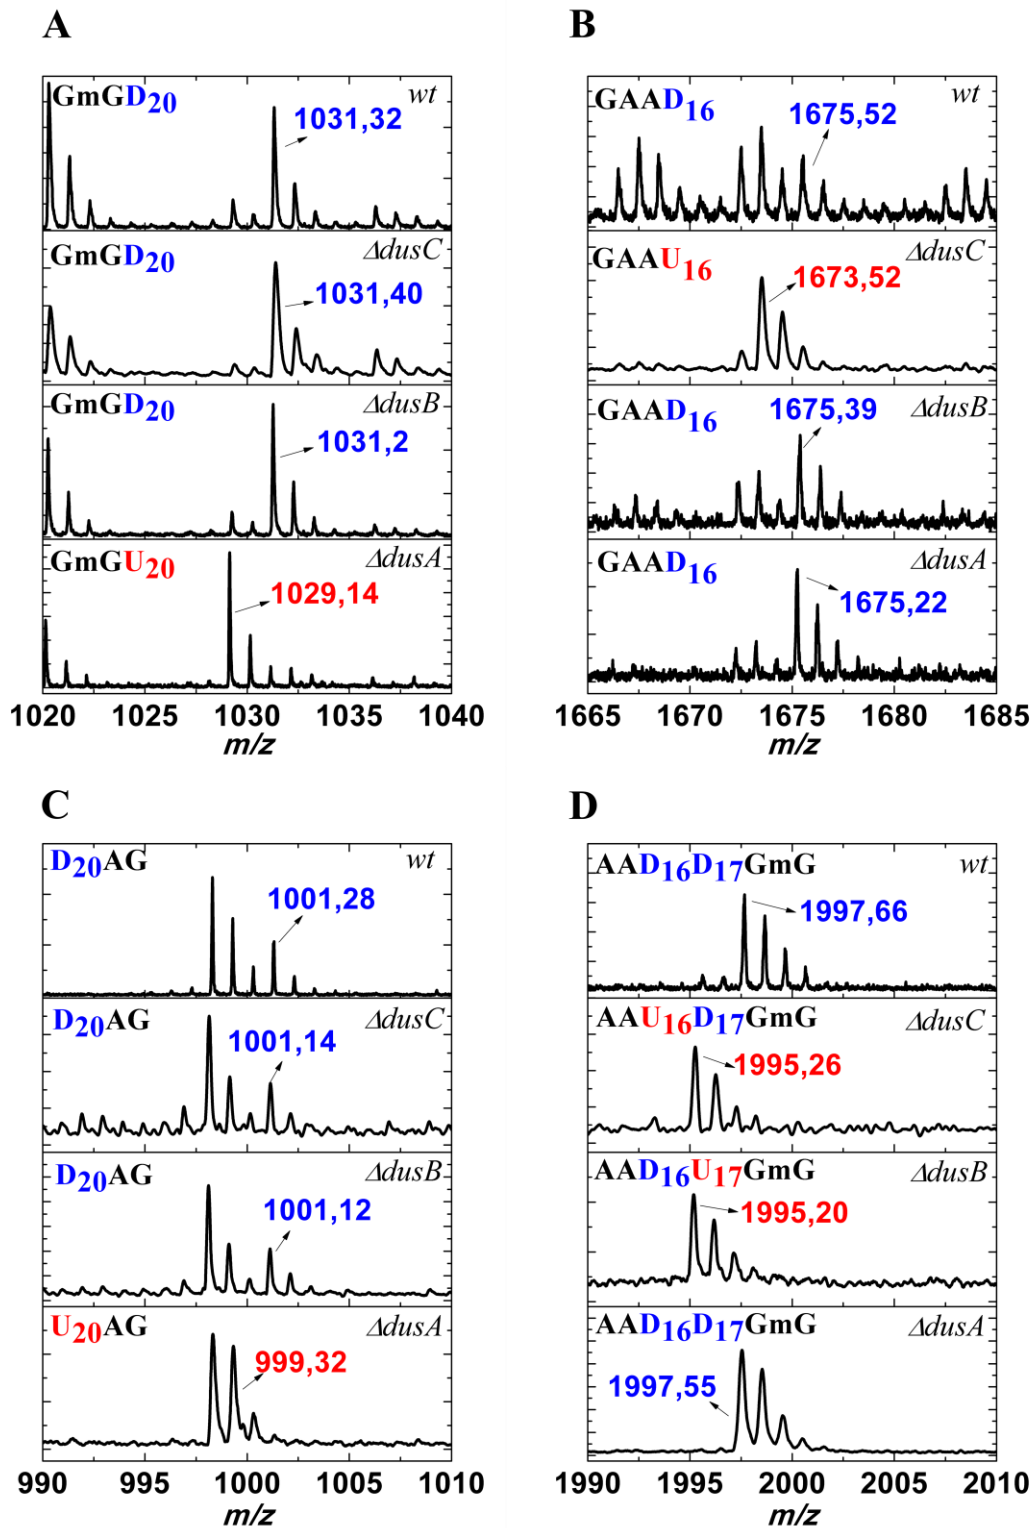

**Supplementary Figure 4.** MALDI-TOF analysis of <sup>Leu</sup>tRNA<sub>CAG</sub> extracted from wild-type and the different single *E.coli dus* knockout strains. (A) and (B) represent a zoom in the spectral region of GmGU<sub>20</sub> and GAAU<sub>16</sub>, respectively, after digestion with RNase A. (C) and (D) are zooms in spectral regions of U<sub>20a</sub>AG and AAU<sub>16</sub>U<sub>17</sub>GmG respectively obtained after RNase T1 digestion. The strains are shown in italic while the sequence and *m/z* of the fragments are in red and blue for absence of dihydrouridine or presence respectively. Gm is the abbreviation for 2'-O-methylguanosine.

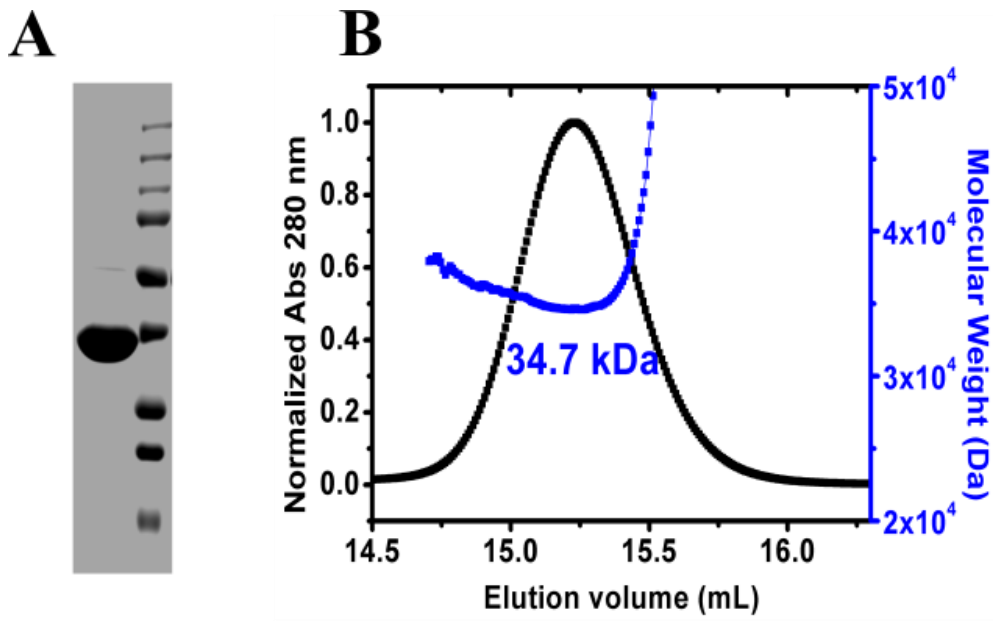

**Supplementary Figure 5. Characterization of recombinant *E. coli* DusB.**

(A) 14 % SDS-PAGE of purified *E. coli* DusB (left) and standard molecular ladders (right) showing a single band migrating at ~36 kDa. (B) SEC-MALLS analysis of *E. coli* DusB.

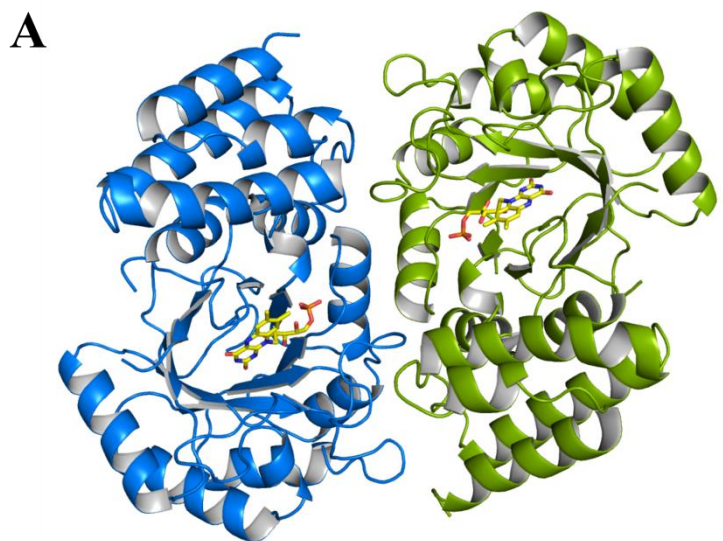

**B**

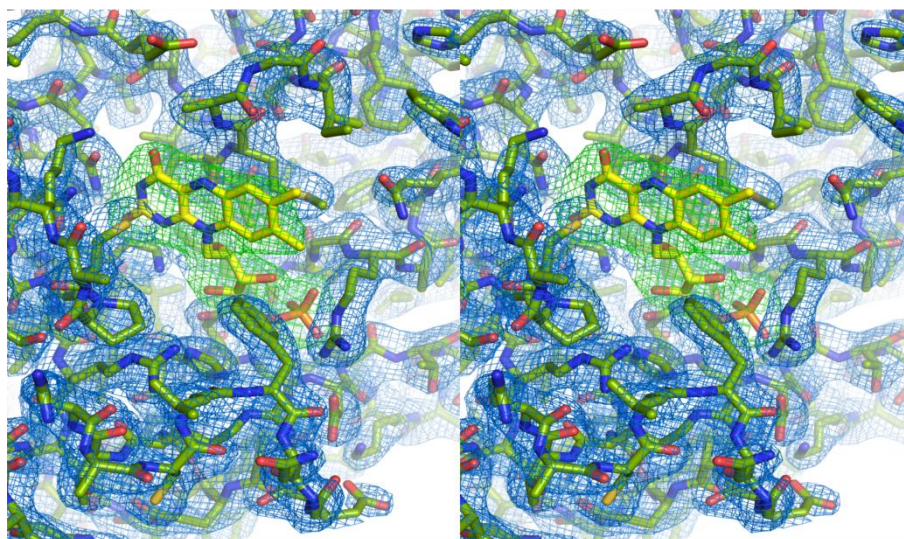

**Supplementary Figure 6.** (A) Crystallographic unit cell showing two molecules of *E. coli* DusB in blue and green cartoon with the FMN cofactor in yellow sticks. (B) Stereoview of a 2Fo-Fc  $\sigma_A$ -weighted electron density map of the FMN binding site contoured at 1 sigma. In green is showed the density when omitting FMN represented in yellow sticks while in blue is the density of the protein with its residues represented in green sticks.



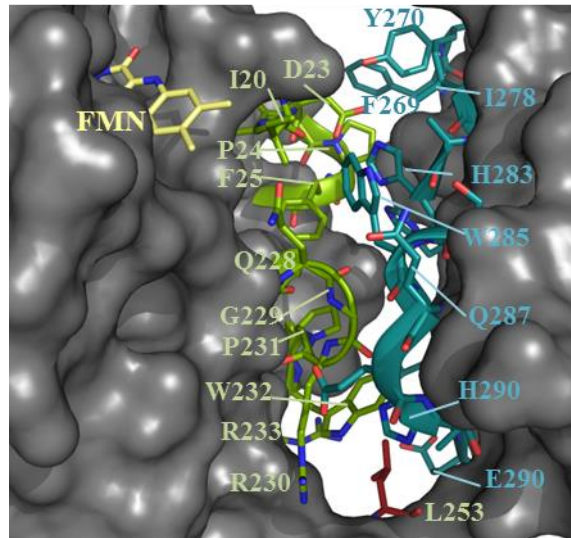

**Supplementary Figure 7.** Structure of the interface between the TIM barrel (residues shown in green) and HD (in blue) in *E. coli* DusB. The FMN is represented in yellow sticks and the protein surface is in grey surface.

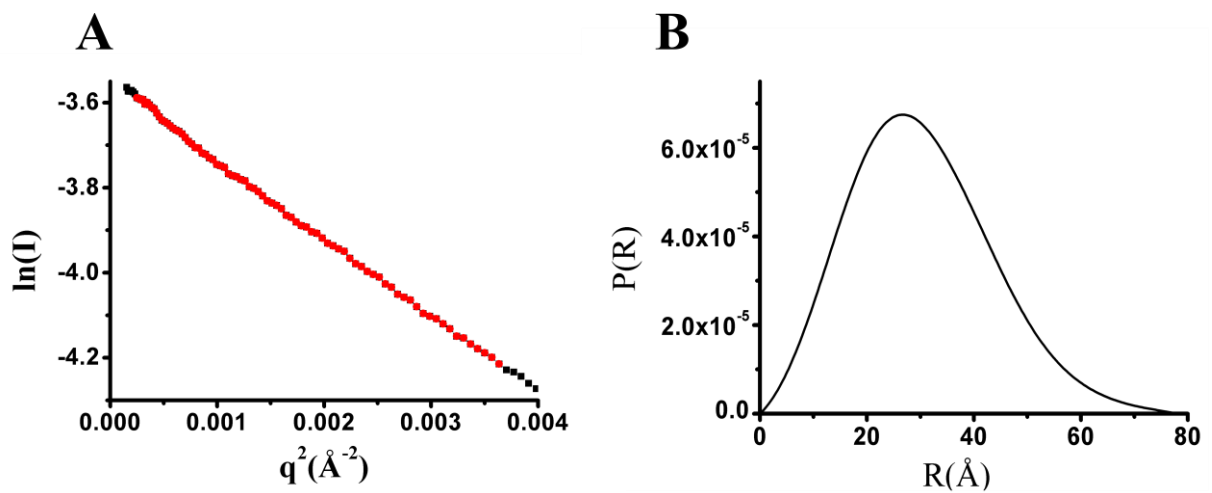

**Supplementary Figure 8.** (A) Guinier plot of *E. coli* DusB. (B) Electron-electron pair distribution of *E. coli* DusB derived from its SAXS curve using Primus.

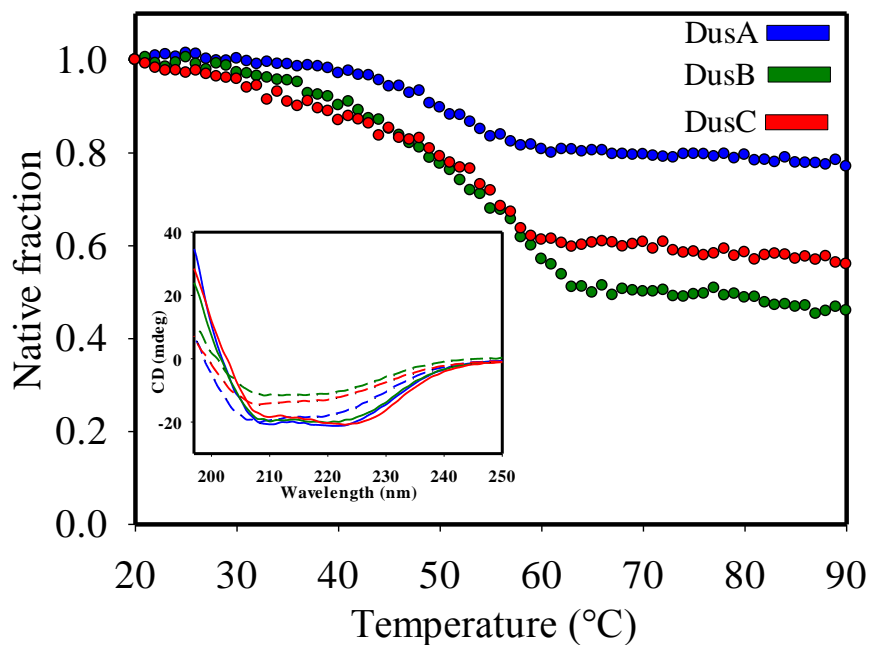

**Supplementary Figure 9.** Thermal stability of *E.coli* Dus enzymes. The dotted curves represent the normalized CD signal at 222 nm as function of temperature. The inset figure is the CD spectra of the respective *E. coli* Dus recorded at 20°C (solid lines) and at 90°C (short dash lines). The curves corresponding to DusA, B and C are colored in blue, green and red, respectively.



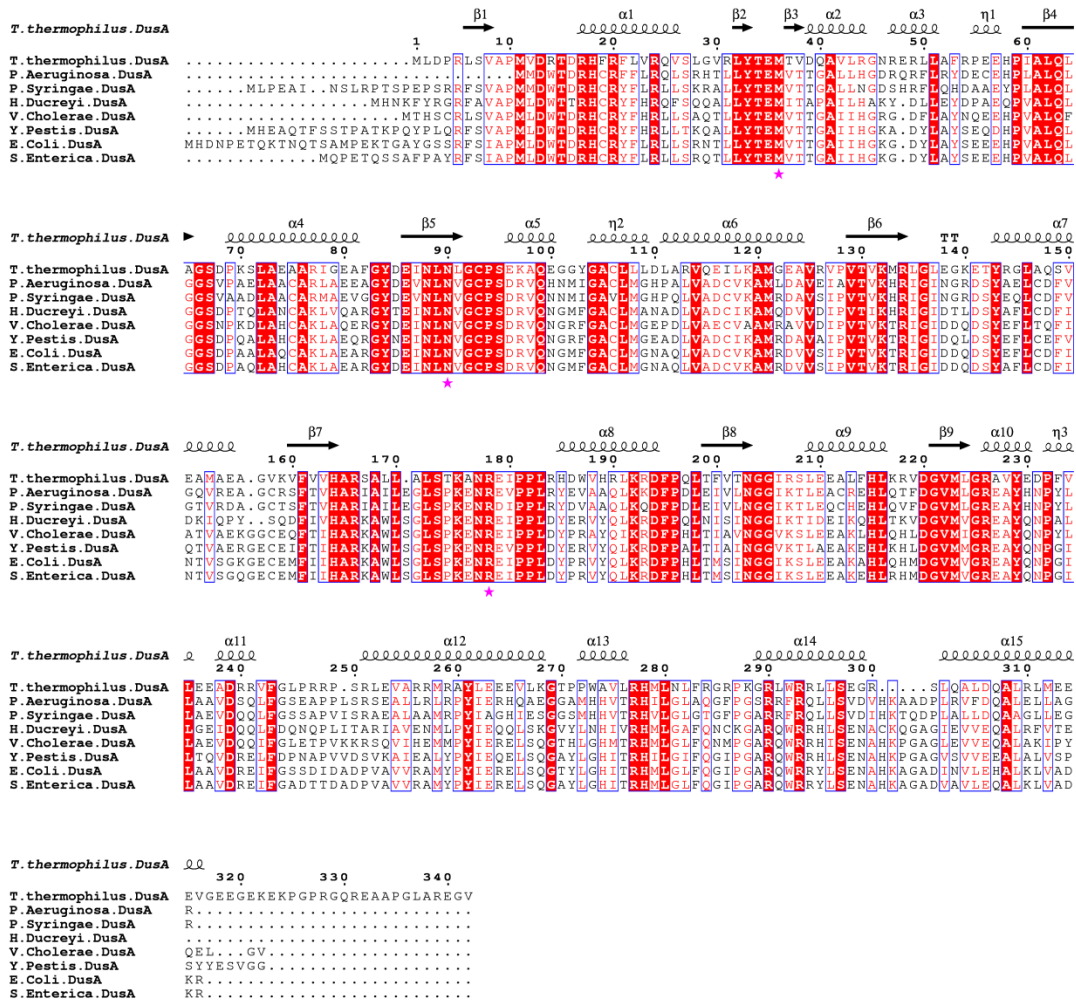

**Supplementary Figure 10.** Sequence alignment of DusA subfamily showing conserved residues (highlighted in red) and similarities (red letters). Residues implicated in stabilization of the target uridine are indicated with a magenta star. The secondary structure corresponding to the primary sequence is indicated above the alignment.

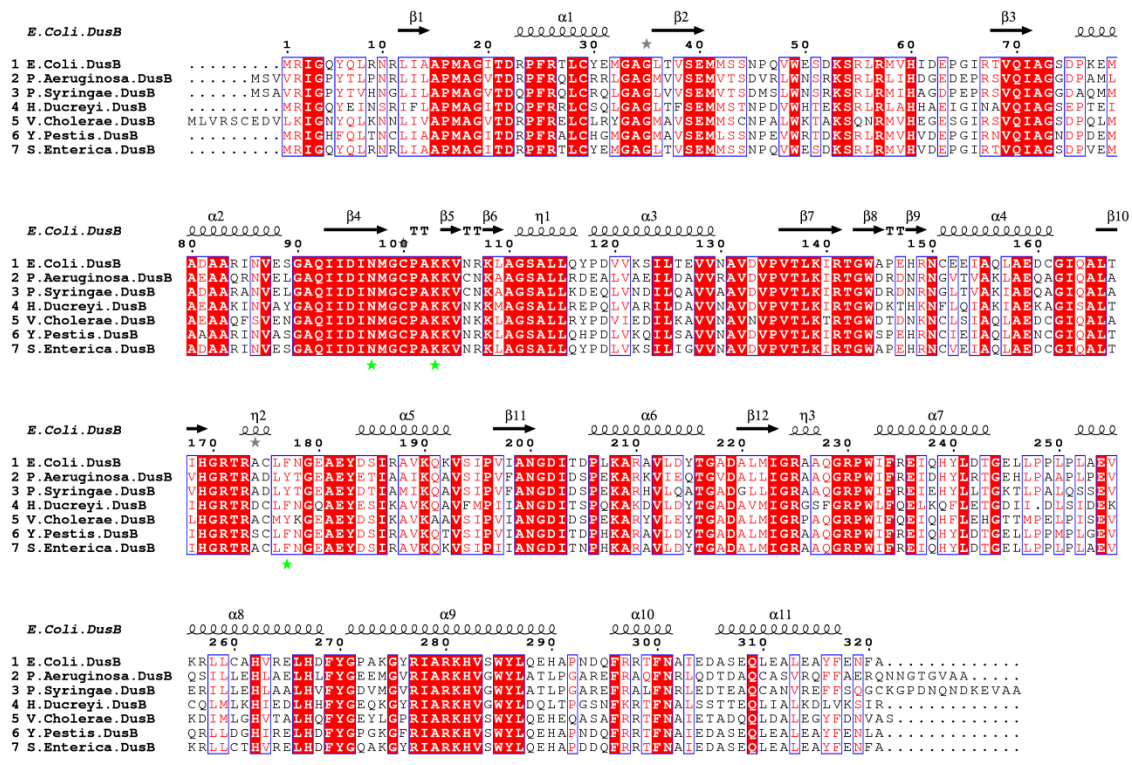

**Supplementary Figure 11.** Sequence alignment of DusB subfamily showing conserved residues (highlighted in red) and similarities (red letters). Residues implicated in stabilization of the target uridine are indicated with a green star. The secondary structure corresponding to the primary sequence is indicated above the alignment.

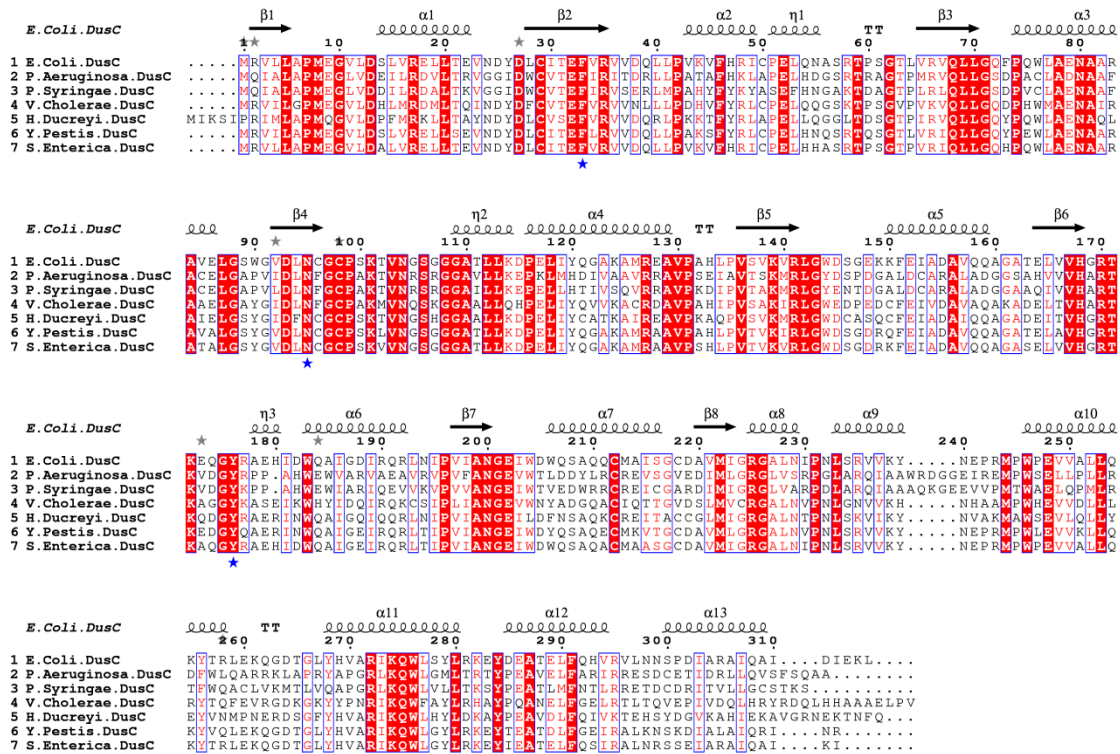

**Supplementary Figure 12.** Sequence alignment of DusC subfamily showing conserved residues (highlighted in red) and similarities (red letters). Residues implicated in stabilization of the target uridine are indicated with a blue star. The secondary structure corresponding to the primary sequence is indicated above the alignment.

**A**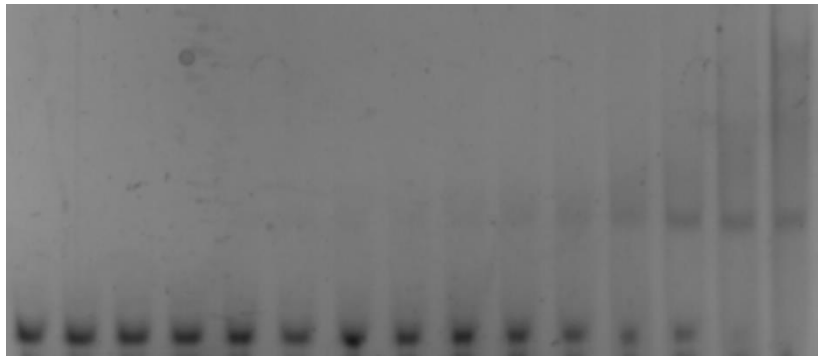**B***E. coli* DusB vs *E. coli* DusC-tRNA<sup>Trp</sup>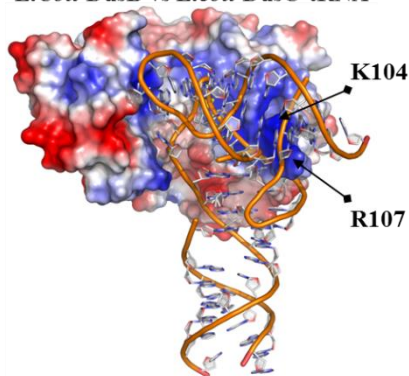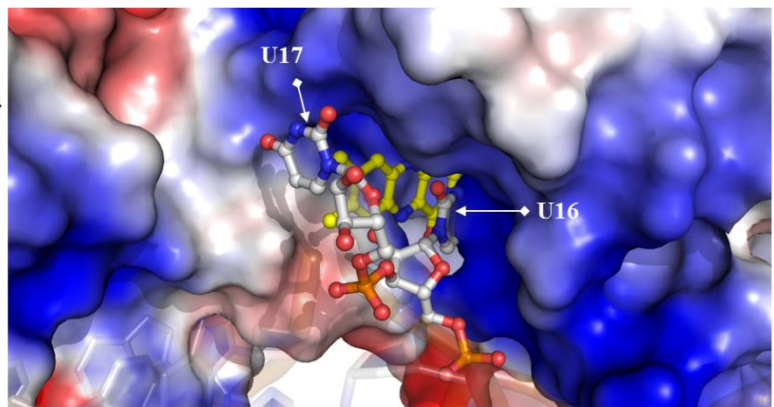**C***E. coli* DusB vs *T. thermophilus* DusA-tRNA<sup>Phe</sup>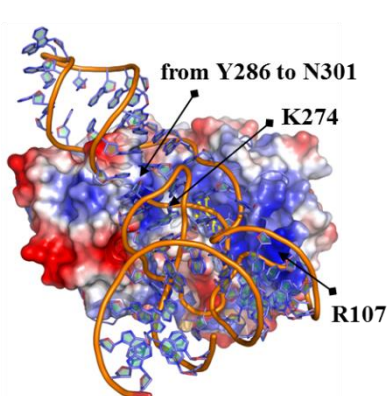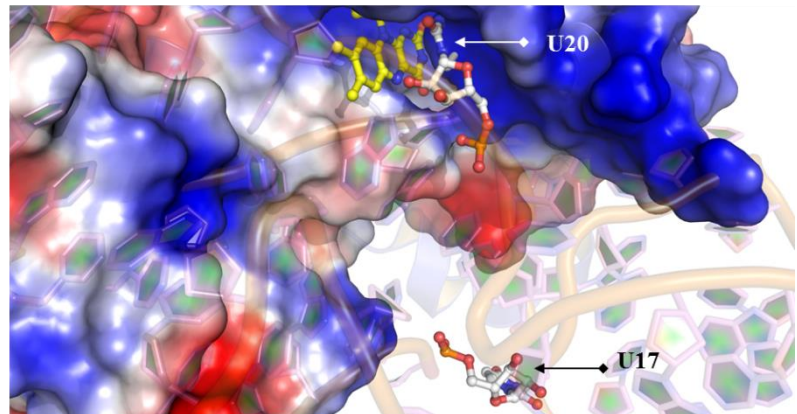

**Supplementary Figure 13.** (A) Electrophoretic mobility shift assay of *E. coli* DusB with bulk tRNA extracted from *E. coli*  $\Delta$ DusB778::*kan*. (B) Structural overlay of *E. coli* DusB on *E. coli* DusC in complex with *E. coli* tRNA<sup>Trp</sup> (4YCP). (C) Structural overlay of *E. coli* DusB on *T. thermophilus* DusA in complex with *T. thermophilus* tRNA<sup>Phe</sup> (3B0V). Insets are zooms near the active sites with FMN shown in yellow sticks while the target uridines are indicated with an arrow.

**Supplementary Table 1- Summary of data collection and refinement statistics**

---

| <i>Escherichia coli</i> DusB                         |                            |
|------------------------------------------------------|----------------------------|
| PDB 6EI9                                             |                            |
| <b>Data collection</b>                               |                            |
| Space group                                          | P4 <sub>3</sub>            |
| Cell dimensions                                      |                            |
| <i>a</i> , <i>b</i> , <i>c</i> (Å)                   | 108.48, 108.48, 70.31      |
| $\alpha$ , $\beta$ , $\gamma$ (°)                    | 90, 90, 90                 |
| Resolution (Å)                                       | 42.95-2.55<br>(2.641-2.55) |
| <i>R</i> <sub>sym</sub> or <i>R</i> <sub>merge</sub> | 0.05516 (1.753)            |
| <i>I</i> / $\sigma$ <i>I</i>                         | 18.96 (0.84)               |
| Completeness (%)                                     | 99.93 (100)                |
| CC(1/2)                                              | 1 (0.439)                  |
| Redundancy                                           | 7.8 (8.1)                  |
| <b>Refinement</b>                                    |                            |
| Resolution (Å)                                       | 42.95-2.55                 |
| No. reflections                                      | 26834 (2675)               |
| <i>R</i> <sub>work</sub> / <i>R</i> <sub>free</sub>  | 0.19/0.24                  |
| No. atoms                                            | 4851                       |
| Protein                                              | 4604                       |
| Ligand/ion                                           | 129                        |
| Water                                                | 118                        |
| <i>B</i> -factors                                    |                            |
| Protein                                              | 91.68                      |
| Ligand/ion                                           | 114.05                     |
| Water                                                | 74.52                      |
| R.m.s. deviations                                    |                            |
| Bond lengths (Å)                                     | 0.015                      |
| Bond angles (°)                                      | 1.88                       |

---

The data set was collected from a single crystal
